# Supplementary material for: Integrated physiological, microbial, and metabolomics analyses revealed the differences in different varieties of Paeonia lactiflora Pall
Source: Front Plant Sci. 2025 May 23;16:1577695. doi: 10.3389/fpls.2025.1577695 (PMC12141275; doi:10.3389/fpls.2025.1577695)
Supplement: Supplementary Table 1 — Illumina sequencing result. [file Table1.xls]

Sample	Raw_reads	Raw_reads_Q20(%)	Raw_reads_Q30(%)	Merge	Merge(%)	Cutadapt	Cutadapt(%)	Clean_reads	Clean_reads(%)	Clean_reads_Q20(%)	Clean_reads_Q30(%)
PSL1	75641	95.5	89	72235	95.5	71215	94.15	46602	61.61	98.98	95.74
PSL2	64539	95.4	88.86	61246	94.9	60349	93.51	39401	61.05	98.96	95.68			66297.66667
PSL3	58713	95.5	89.02	55943	95.28	55092	93.83	35985	61.29	98.95	95.64
RSL1	58518	95.32	88.72	55434	94.73	54567	93.25	35555	60.76	98.94	95.61
RSL2	51470	95.16	88.4	48415	94.06	47658	92.59	30188	58.65	98.94	95.57
RSL3	71507	95.51	89.01	68306	95.52	67285	94.1	44535	62.28	98.97	95.72
WPSL1	67569	95.41	88.9	64132	94.91	63207	93.54	41561	61.51	98.96	95.69
WPSL2	62173	95.32	88.77	58700	94.41	57821	93	37916	60.98	98.95	95.63
WPSL3	57294	95.42	88.89	54489	95.1	53681	93.69	35082	61.23	98.95	95.65
WSL1	60961	95.57	89.11	58141	95.37	57248	93.91	38245	62.74	98.97	95.72
WSL2	60244	95.42	88.82	57239	95.01	56325	93.49	36825	61.13	98.95	95.64
WSL3	52587	95.43	88.96	49807	94.71	48993	93.17	32738	62.25	98.97	95.68
Total	741216	1144.96	1066.46	704087	1139.5	693441	1122.23	454633	735.48	1187.49	1147.97
