# Supplementary material for: Integrated physiological, microbial, and metabolomics analyses revealed the differences in different varieties of Paeonia lactiflora Pall
Source: Front Plant Sci. 2025 May 23;16:1577695. doi: 10.3389/fpls.2025.1577695 (PMC12141275; doi:10.3389/fpls.2025.1577695)
Supplement: Supplementary Table 2 — Analyzed the composition of rhizosphere microorganisms at the phylum levels. [file Table2.xls]

Phylum	PSL	RSL	WSL	WPSL
Acidobacteria	6	9	15	10
Actinobacteria	3	3	3	3
Bacteria_unclassified	0	0	0	0
Bacteroidetes	0	0	0	0
Chloroflexi	0	0	0	1
Cyanobacteria	0	0	0	0
Firmicutes	0	0	0	0
Gemmatimonadetes	5	14	11	11
Patescibacteria	0	0	0	0
Planctomycetes	0	0	0	0
Proteobacteria	56	54	54	46
	4	4	4	5
