# Supplementary material for: Integrated physiological, microbial, and metabolomics analyses revealed the differences in different varieties of Paeonia lactiflora Pall
Source: Front Plant Sci. 2025 May 23;16:1577695. doi: 10.3389/fpls.2025.1577695 (PMC12141275; doi:10.3389/fpls.2025.1577695)
Supplement: Supplementary Table 3 — Analyzed the composition of rhizosphere microorganisms at the genus levels. [file Table3.xls]

Genus	PSL	RSL	WSL	WPSL
Acidibacter	0	0	0	0
Acinetobacter	0	0	0	0
Actinocorallia	0	0	0	0
AKAU4049_ge	0	1	0	1
Alphaproteobacteria_unclassified	0	3	3	0
Bacteria_unclassified	0	0	0	0
Brevundimonas	0	0	0	0
Caulobacter	0	0	0	0
Chelativorans	0	0	0	0
Chitinophagaceae_unclassified	0	0	0	0
Dongia	3	2	2	3
Ellin6055	0	1	3	0
Frankia	0	0	0	0
Frankiales_unclassified	0	0	0	0
Gammaproteobacteria_unclassified	0	0	0	0
Gemmataceae_uncultured	0	0	0	0
Gemmatimonadaceae_unclassified	1	1	2	3
Gemmatimonadaceae_uncultured	4	12	9	6
Hafnia-Obesumbacterium	0	0	0	0
Halomonadaceae_unclassified	0	0	0	0
Halomonas	43	44	37	40
Hyphomonadaceae_unclassified	0	0	0	0
Ideonella	0	0	0	0
IMCC26256_ge	3	3	3	3
KD4-96_ge	0	0	0	0
Longimicrobiaceae_ge	0	0	0	1
Massilia	0	0	1	0
Micromonosporaceae_unclassified	0	0	0	0
Microtrichales_uncultured_ge	0	0	0	0
MND1	5	1	5	1
Moraxellaceae_uncultured	0	0	0	0
Mycobacterium	0	0	0	0
Nocardioides	0	0	0	0
Novosphingobium	0	0	0	0
Oceanicaulis	2	2	2	2
Oxyphotobacteria_unclassified	0	0	0	0
P2-11E_ge	0	0	0	0
Pelagibacterium	0	0	0	0
PLTA13_ge	3	1	0	0
Pluralibacter	0	0	0	0
Providencia	0	0	0	0
Pseudonocardia	0	0	0	0
Pseudoxanthomonas	0	0	0	0
RB41	0	3	9	4
Rhizobiaceae_unclassified	0	0	0	0
Rhodomicrobium	0	0	0	0
Rikenella	0	0	0	0
S0134_terrestrial_group_ge	0	0	0	0
Saccharimonadales_ge	0	0	0	0
Salipaludibacillus	0	0	0	0
SBR1031_ge	0	0	0	0
Serratia	0	0	0	0
Shimwellia	0	0	0	0
Sphingomonadaceae_unclassified	0	0	0	0
Steroidobacter	0	0	0	0
Streptomyces	0	0	0	0
Subgroup_21_ge	0	0	0	0
Subgroup_5_ge	0	0	0	0
Subgroup_6_ge	6	6	6	6
SWB02	0	0	0	0
Thermomonosporaceae_unclassified	0	0	0	0
UTCFX1	0	0	0	1
Xanthobacteraceae_unclassified	0	0	1	0
Xanthobacteraceae_uncultured	0	0	0	0
