# Supplementary material for: Integrated physiological, microbial, and metabolomics analyses revealed the differences in different varieties of Paeonia lactiflora Pall
Source: Front Plant Sci. 2025 May 23;16:1577695. doi: 10.3389/fpls.2025.1577695 (PMC12141275; doi:10.3389/fpls.2025.1577695)
Supplement: Supplementary Table 5 — All metabolites. [file Table5.xls]

level2	PSL	RSL	WPSL	WSL	W_SL2	W_SL3
Amino acid metabolism	242.3213	243.6086	197.8367	211.2373	220.1599	276.5051	895.0039	0.143483919
Biosynthesis of other secondary metabolites	35.9563	37.2587	31.1438	33.3126	38.1572	43.8087	137.6714	0.022071001
Carbohydrate metabolism	247.1073	244.6256	197.6378	206.562	217.6832	274.7843	895.9327	0.143632821
Cell growth and death	22.246	23.1855	18.7379	20.7802	21.8085	26.75	84.9496	0.013618825
Cell motility	91.1099	81.8755	67.5018	61.1685	70.8644	87.685	301.6557	0.048360395
Cellular community - prokaryotes	4.381	4.0476	3.4286	3.2857	3.9524	4.619	15.1429	0.002427657
Digestive system	0.12	0.2	0.2	0.24	0.32	0.36	0.76	0.000121841
Endocrine system	0	0	0.359	0	0.5385	0.5128	0.359	5.75536E-05
Energy metabolism	88.022	86.5457	76.0965	75.8602	86.0276	106.9502	326.5244	0.052347258
Environmental adaptation	3.6	3.4	2.7143	2.8	3.1429	3.7143	12.5143	0.002006249
Folding, sorting and degradation	59.4405	58.2984	47.7126	51.0043	53.2551	66.6088	216.4558	0.034701443
Glycan biosynthesis and metabolism	53.6027	53.5522	45.483	47.7263	50.5827	63.0116	200.3642	0.032121693
Infectious disease: bacterial	1.4589	1.3106	1.1515	0.9892	1.1872	1.5032	4.9102	0.000787186
Infectious disease: parasitic	0.5366	0.5366	0.5428	0.439	0.5928	0.8149	2.055	0.00032945
Lipid metabolism	121.8491	120.3326	97.5851	105.6064	108.2054	136.1438	445.3732	0.071400686
Membrane transport	37.5361	36.032	28.9433	30.0369	31.4927	39.4894	132.5483	0.021249683
Metabolism of cofactors and vitamins	238.6861	231.9104	187.8246	196.8396	206.9021	259.6101	855.2607	0.137112427
Metabolism of other amino acids	113.7183	114.6365	92.6472	103.1893	106.4488	131.6983	424.1913	0.068004877
Metabolism of terpenoids and polyketides	104.7247	107.616	88.9362	100.1189	102.087	125.1536	401.3958	0.064350381
Nucleotide metabolism	30.1978	30.0075	24.5007	25.8351	27.2288	33.9988	110.5411	0.017721565
Replication and repair	89.6348	89.1793	72.7566	76.3862	81.2579	100.543	327.9569	0.052576912
Signal transduction	12.236	11.1553	9.2795	9.0807	10.2547	12.5217	41.7515	0.006693456
Signaling molecules and interaction	0	0	0	0	0	0	0	0
Transcription	11.4333	12.1667	10.1	11.4333	11.9333	14.4667	45.1333	0.007235614
Translation	46.643	47.8294	39.376	42.1669	43.9064	54.3616	176.0153	0.028218162
Transport and catabolism	6.2286	6.2286	5.0213	5.3429	5.6499	7.0213	22.8214	0.003658648
Xenobiotics biodegradation and metabolism	43.291	44.5277	36.3573	36.1961	40.7118	50.6035	160.3721	0.025710298
							6237.66
