# Supplementary material for: Integrated physiological, microbial, and metabolomics analyses revealed the differences in different varieties of Paeonia lactiflora Pall
Source: Front Plant Sci. 2025 May 23;16:1577695. doi: 10.3389/fpls.2025.1577695 (PMC12141275; doi:10.3389/fpls.2025.1577695)
Supplement: Supplementary Table 6 — Differential metabolites. [file Table6.xlsx]

## Sheet: Sheet 1
metabolites1
