# Supplementary material for: Integrated physiological, microbial, and metabolomics analyses revealed the differences in different varieties of Paeonia lactiflora Pall
Source: Frontiers journal article supplement (doi:10.3389/fpls.2025.1577695), 2025-05-23
Supplement: Table_4.xls [file Table_4.xls]

## Sheet: Lefse-group-stats
Taxonomy	Mean	Group	LDA	Pvalue
k_Bacteria.p_Acidobacteria.c_Subgroup_5.o_Subgroup_5_or.f_Subgroup_5_fa	0			-
k_Bacteria.p_Actinobacteria.c_Actinobacteria.o_Frankiales.f_Frankiaceae	0			-
k_Bacteria.p_Proteobacteria.c_Gammaproteobacteria.o_Enterobacteriales.f_Enterobacteriaceae.g_Hafnia_Obesumbacterium	0			-
k_Bacteria.p_Acidobacteria	5.41814			-
k_Bacteria.p_Proteobacteria	5.77003			-
k_Bacteria.p_Bacteria_unclassified.c_Bacteria_unclassified.o_Bacteria_unclassified	0			-
k_Bacteria.p_Proteobacteria.c_Alphaproteobacteria.o_Caulobacterales.f_Hyphomonadaceae.g_Hyphomonadaceae_unclassified	0			-
k_Bacteria.p_Proteobacteria.c_Alphaproteobacteria.o_Sphingomonadales.f_Sphingomonadaceae.g_Novosphingobium	0			-
k_Bacteria.p_Proteobacteria.c_Alphaproteobacteria.o_Dongiales	5.24988	P_SL	4.72445	0.0301209
k_Bacteria.p_Actinobacteria.c_Actinobacteria.o_Corynebacteriales.f_Mycobacteriaceae.g_Mycobacterium	0			-
k_Bacteria.p_Acidobacteria.c_Subgroup_5.o_Subgroup_5_or	0			-
k_Bacteria.p_Chloroflexi.c_Anaerolineae.o_SBR1031	0			-
k_Bacteria.p_Chloroflexi	4.74473			-
k_Bacteria.p_Bacteroidetes.c_Bacteroidia.o_Bacteroidales.f_Rikenellaceae	0			-
k_Bacteria.p_Proteobacteria.c_Alphaproteobacteria.o_Sphingomonadales	5.11711			-
k_Bacteria.p_Actinobacteria.c_Actinobacteria.o_Propionibacteriales	0			-
k_Bacteria.p_Proteobacteria.c_Gammaproteobacteria.o_Betaproteobacteriales.f_Burkholderiaceae.g_Ideonella	0			-
k_Bacteria.p_Proteobacteria.c_Gammaproteobacteria.o_PLTA13.f_PLTA13_fa.g_PLTA13_ge	5.24988	P_SL	4.97926	0.0248886
k_Bacteria.p_Chloroflexi.c_P2_11E.o_P2_11E_or.f_P2_11E_fa.g_P2_11E_ge	0			-
k_Bacteria.p_Proteobacteria.c_Alphaproteobacteria.o_Rhizobiales.f_Rhizobiaceae.g_Chelativorans	0			-
k_Bacteria.p_Proteobacteria.c_Gammaproteobacteria.o_Betaproteobacteriales.f_Burkholderiaceae.g_Massilia	4.61979			-
k_Bacteria.p_Bacteroidetes.c_Bacteroidia.o_Bacteroidales.f_Rikenellaceae.g_Rikenella	0			-
k_Bacteria.p_Bacteria_unclassified.c_Bacteria_unclassified	0			-
k_Bacteria.p_Proteobacteria.c_Gammaproteobacteria.o_Pseudomonadales.f_Moraxellaceae	0			-
k_Bacteria.p_Proteobacteria.c_Gammaproteobacteria.o_Enterobacteriales	0			-
k_Bacteria.p_Acidobacteria.c_Subgroup_6.o_Subgroup_6_or.f_Subgroup_6_fa	5.24988			-
k_Bacteria.p_Actinobacteria.c_Actinobacteria.o_Micromonosporales	0			-
k_Bacteria.p_Actinobacteria.c_Actinobacteria.o_Corynebacteriales	0			-
k_Bacteria.p_Planctomycetes.c_Planctomycetacia	0			-
k_Bacteria.p_Patescibacteria.c_Saccharimonadia	0			-
k_Bacteria.p_Proteobacteria.c_Gammaproteobacteria.o_Xanthomonadales.f_Xanthomonadaceae	0			-
k_Bacteria.p_Proteobacteria.c_Gammaproteobacteria.o_Betaproteobacteriales.f_Nitrosomonadaceae.g_MND1	5.04576			-
k_Bacteria.p_Actinobacteria.c_Actinobacteria.o_Pseudonocardiales.f_Pseudonocardiaceae.g_Pseudonocardia	0			-
k_Bacteria.p_Actinobacteria.c_Actinobacteria.o_Streptosporangiales.f_Thermomonosporaceae.g_Thermomonosporaceae_unclassified	0			-
k_Bacteria.p_Gemmatimonadetes.c_S0134_terrestrial_group.o_S0134_terrestrial_group_or	0			-
k_Bacteria.p_Actinobacteria.c_Actinobacteria.o_Streptosporangiales.f_Thermomonosporaceae.g_Actinocorallia	0			-
k_Bacteria.p_Proteobacteria.c_Alphaproteobacteria.o_Sphingomonadales.f_Sphingomonadaceae.g_Sphingomonadaceae_unclassified	0			-
k_Bacteria.p_Actinobacteria.c_Actinobacteria.o_Frankiales	0			-
k_Bacteria.p_Gemmatimonadetes.c_S0134_terrestrial_group.o_S0134_terrestrial_group_or.f_S0134_terrestrial_group_fa.g_S0134_terrestrial_group_ge	0			-
k_Bacteria.p_Proteobacteria.c_Alphaproteobacteria.o_Caulobacterales.f_Caulobacteraceae	0			-
k_Bacteria.p_Acidobacteria.c_Subgroup_21.o_Subgroup_21_or.f_Subgroup_21_fa.g_Subgroup_21_ge	0			-
k_Bacteria.p_Patescibacteria	0			-
k_Bacteria.p_Gemmatimonadetes.c_Longimicrobia.o_Longimicrobiales	4.74473			-
k_Bacteria.p_Acidobacteria.c_Blastocatellia__Subgroup_4_	5.11711			-
k_Bacteria.p_Gemmatimonadetes.c_AKAU4049.o_AKAU4049_or.f_AKAU4049_fa	4.82391			-
k_Bacteria.p_Planctomycetes	0			-
k_Bacteria.p_Proteobacteria.c_Alphaproteobacteria.o_Sphingomonadales.f_Sphingomonadaceae.g_Ellin6055	5.11711			-
k_Bacteria.p_Chloroflexi.c_Anaerolineae.o_SBR1031.f_SBR1031_fa.g_SBR1031_ge	0			-
k_Bacteria.p_Bacteria_unclassified.c_Bacteria_unclassified.o_Bacteria_unclassified.f_Bacteria_unclassified.g_Bacteria_unclassified	0			-
k_Bacteria.p_Bacteroidetes.c_Bacteroidia.o_Bacteroidales	0			-
k_Bacteria.p_Proteobacteria.c_Gammaproteobacteria.o_Xanthomonadales	0			-
k_Bacteria.p_Proteobacteria.c_Alphaproteobacteria.o_Caulobacterales	5.08715			-
k_Bacteria.p_Proteobacteria.c_Gammaproteobacteria.o_PLTA13	5.24988	P_SL	4.96711	0.0248886
k_Bacteria.p_Gemmatimonadetes.c_Longimicrobia	4.74473			-
k_Bacteria.p_Proteobacteria.c_Alphaproteobacteria.o_Dongiales.f_Dongiaceae.g_Dongia	5.24988	P_SL	4.70376	0.0301209
k_Bacteria.p_Proteobacteria.c_Gammaproteobacteria.o_Steroidobacterales.f_Steroidobacteraceae.g_Steroidobacter	0			-
k_Bacteria.p_Bacteria_unclassified	0			-
k_Bacteria.p_Actinobacteria.c_Actinobacteria.o_Frankiales.f_Frankiales_unclassified	0			-
k_Bacteria.p_Gemmatimonadetes.c_AKAU4049.o_AKAU4049_or	4.82391			-
k_Bacteria.p_Proteobacteria.c_Alphaproteobacteria.o_Caulobacterales.f_Hyphomonadaceae	5.08715			-
k_Bacteria.p_Planctomycetes.c_Planctomycetacia.o_Gemmatales	0			-
k_Bacteria.p_Bacteroidetes.c_Bacteroidia.o_Chitinophagales.f_Chitinophagaceae.g_Chitinophagaceae_unclassified	0			-
k_Bacteria.p_Gemmatimonadetes.c_AKAU4049.o_AKAU4049_or.f_AKAU4049_fa.g_AKAU4049_ge	4.82391			-
k_Bacteria.p_Proteobacteria.c_Gammaproteobacteria.o_Steroidobacterales	0			-
k_Bacteria.p_Gemmatimonadetes.c_Gemmatimonadetes	5.22185			-
k_Bacteria.p_Firmicutes.c_Bacilli	0			-
k_Bacteria.p_Actinobacteria.c_Actinobacteria.o_Micromonosporales.f_Micromonosporaceae.g_Micromonosporaceae_unclassified	0			-
k_Bacteria.p_Proteobacteria.c_Alphaproteobacteria.o_Dongiales.f_Dongiaceae	5.24988	P_SL	4.77329	0.0301209
k_Bacteria.p_Acidobacteria.c_Subgroup_5	0			-
k_Bacteria.p_Acidobacteria.c_Subgroup_6	5.24988			-
k_Bacteria.p_Acidobacteria.c_Subgroup_6.o_Subgroup_6_or.f_Subgroup_6_fa.g_Subgroup_6_ge	5.24988			-
k_Bacteria.p_Gemmatimonadetes.c_Gemmatimonadetes.o_Gemmatimonadales.f_Gemmatimonadaceae	5.22185			-
k_Bacteria.p_Acidobacteria.c_Blastocatellia__Subgroup_4_.o_Pyrinomonadales	5.11711			-
k_Bacteria.p_Proteobacteria.c_Alphaproteobacteria	5.68318			-
k_Bacteria.p_Proteobacteria.c_Alphaproteobacteria.o_Caulobacterales.f_Caulobacteraceae.g_Brevundimonas	0			-
k_Bacteria.p_Cyanobacteria	0			-
k_Bacteria.p_Proteobacteria.c_Gammaproteobacteria.o_Enterobacteriales.f_Enterobacteriaceae.g_Shimwellia	0			-
k_Bacteria.p_Chloroflexi.c_KD4_96	0			-
k_Bacteria.p_Proteobacteria.c_Gammaproteobacteria.o_PLTA13.f_PLTA13_fa	5.24988	P_SL	4.96442	0.0248886
k_Bacteria.p_Actinobacteria.c_Actinobacteria.o_Streptosporangiales	0			-
k_Bacteria.p_Actinobacteria.c_Acidimicrobiia.o_IMCC26256.f_IMCC26256_fa	5.24988			-
k_Bacteria.p_Proteobacteria.c_Alphaproteobacteria.o_Rhizobiales.f_Devosiaceae.g_Pelagibacterium	0			-
k_Bacteria.p_Cyanobacteria.c_Oxyphotobacteria.o_Oxyphotobacteria_unclassified	0			-
k_Bacteria.p_Proteobacteria.c_Alphaproteobacteria.o_Rhizobiales.f_Rhizobiaceae	0			-
k_Bacteria.p_Proteobacteria.c_Alphaproteobacteria.o_Rhizobiales.f_Xanthobacteraceae.g_Xanthobacteraceae_uncultured	0			-
k_Bacteria.p_Proteobacteria.c_Alphaproteobacteria.o_Rhizobiales.f_Rhizobiaceae.g_Rhizobiaceae_unclassified	0			-
k_Bacteria.p_Proteobacteria.c_Gammaproteobacteria.o_Betaproteobacteriales.f_Burkholderiaceae	4.61979			-
k_Bacteria.p_Proteobacteria.c_Alphaproteobacteria.o_Rhizobiales.f_Rhodomicrobiaceae	0			-
k_Bacteria.p_Planctomycetes.c_Planctomycetacia.o_Gemmatales.f_Gemmataceae	0			-
k_Bacteria.p_Proteobacteria.c_Alphaproteobacteria.o_Caulobacterales.f_Caulobacteraceae.g_Caulobacter	0			-
k_Bacteria.p_Gemmatimonadetes	5.4437			-
k_Bacteria.p_Proteobacteria.c_Gammaproteobacteria	5.46073			-
k_Bacteria.p_Actinobacteria.c_Actinobacteria.o_Pseudonocardiales	0			-
k_Bacteria.p_Actinobacteria.c_Actinobacteria.o_Streptomycetales.f_Streptomycetaceae.g_Streptomyces	0			-
k_Bacteria.p_Gemmatimonadetes.c_S0134_terrestrial_group.o_S0134_terrestrial_group_or.f_S0134_terrestrial_group_fa	0			-
k_Bacteria.p_Actinobacteria.c_Actinobacteria.o_Pseudonocardiales.f_Pseudonocardiaceae	0			-
k_Bacteria.p_Proteobacteria.c_Gammaproteobacteria.o_Oceanospirillales	0			-
k_Bacteria.p_Proteobacteria.c_Alphaproteobacteria.o_Rhizobiales.f_Rhodomicrobiaceae.g_Rhodomicrobium	0			-
k_Bacteria.p_Chloroflexi.c_Anaerolineae	4.74473			-
k_Bacteria.p_Bacteria_unclassified.c_Bacteria_unclassified.o_Bacteria_unclassified.f_Bacteria_unclassified	0			-
k_Bacteria.p_Actinobacteria.c_Actinobacteria.o_Frankiales.f_Frankiaceae.g_Frankia	0			-
k_Bacteria.p_Proteobacteria.c_Gammaproteobacteria.o_Gammaproteobacteria_unclassified.f_Gammaproteobacteria_unclassified	0			-
k_Bacteria.p_Chloroflexi.c_P2_11E.o_P2_11E_or.f_P2_11E_fa	0			-
k_Bacteria.p_Proteobacteria.c_Gammaproteobacteria.o_Betaproteobacteriales	5.04576			-
k_Bacteria.p_Proteobacteria.c_Gammaproteobacteria.o_Gammaproteobacteria_Incertae_Sedis	0			-
k_Bacteria.p_Proteobacteria.c_Gammaproteobacteria.o_Betaproteobacteriales.f_Nitrosomonadaceae	5.04576			-
k_Bacteria.p_Proteobacteria.c_Gammaproteobacteria.o_Enterobacteriales.f_Enterobacteriaceae.g_Serratia	0			-
k_Bacteria.p_Actinobacteria.c_Acidimicrobiia.o_IMCC26256.f_IMCC26256_fa.g_IMCC26256_ge	5.24988			-
k_Bacteria.p_Proteobacteria.c_Gammaproteobacteria.o_Enterobacteriales.f_Enterobacteriaceae	0			-
k_Bacteria.p_Proteobacteria.c_Gammaproteobacteria.o_Oceanospirillales.f_Halomonadaceae.g_Halomonas	0			-
k_Bacteria.p_Chloroflexi.c_KD4_96.o_KD4_96_or.f_KD4_96_fa	0			-
k_Bacteria.p_Firmicutes.c_Bacilli.o_Bacillales.f_Sporolactobacillaceae.g_Salipaludibacillus	0			-
k_Bacteria.p_Proteobacteria.c_Alphaproteobacteria.o_Alphaproteobacteria_unclassified.f_Alphaproteobacteria_unclassified	5.23004	R_SL	4.99788	0.013249
k_Bacteria.p_Actinobacteria.c_Acidimicrobiia.o_Microtrichales	0			-
k_Bacteria.p_Proteobacteria.c_Alphaproteobacteria.o_Alphaproteobacteria_unclassified	5.23004	R_SL	4.99369	0.013249
k_Bacteria.p_Proteobacteria.c_Gammaproteobacteria.o_Gammaproteobacteria_unclassified	0			-
k_Bacteria.p_Chloroflexi.c_P2_11E	0			-
k_Bacteria.p_Bacteroidetes.c_Bacteroidia	0			-
k_Bacteria.p_Gemmatimonadetes.c_Longimicrobia.o_Longimicrobiales.f_Longimicrobiaceae	4.74473			-
k_Bacteria.p_Actinobacteria.c_Acidimicrobiia.o_IMCC26256	5.24988			-
k_Bacteria.p_Cyanobacteria.c_Oxyphotobacteria.o_Oxyphotobacteria_unclassified.f_Oxyphotobacteria_unclassified	0			-
k_Bacteria.p_Proteobacteria.c_Gammaproteobacteria.o_Pseudomonadales.f_Moraxellaceae.g_Acinetobacter	0			-
k_Bacteria.p_Acidobacteria.c_Subgroup_5.o_Subgroup_5_or.f_Subgroup_5_fa.g_Subgroup_5_ge	0			-
k_Bacteria.p_Proteobacteria.c_Gammaproteobacteria.o_Enterobacteriales.f_Enterobacteriaceae.g_Pluralibacter	0			-
k_Bacteria.p_Proteobacteria.c_Gammaproteobacteria.o_Pseudomonadales.f_Moraxellaceae.g_Moraxellaceae_uncultured	0			-
k_Bacteria.p_Acidobacteria.c_Blastocatellia__Subgroup_4_.o_Pyrinomonadales.f_Pyrinomonadaceae	5.11711			-
k_Bacteria.p_Firmicutes.c_Bacilli.o_Bacillales.f_Sporolactobacillaceae	0			-
k_Bacteria.p_Chloroflexi.c_Anaerolineae.o_Anaerolineales	4.74473			-
k_Bacteria.p_Proteobacteria.c_Gammaproteobacteria.o_Pseudomonadales	0			-
k_Bacteria.p_Bacteroidetes	0			-
k_Bacteria.p_Gemmatimonadetes.c_S0134_terrestrial_group	0			-
k_Bacteria.p_Proteobacteria.c_Gammaproteobacteria.o_Steroidobacterales.f_Steroidobacteraceae	0			-
k_Bacteria.p_Proteobacteria.c_Gammaproteobacteria.o_Xanthomonadales.f_Xanthomonadaceae.g_Pseudoxanthomonas	0			-
k_Bacteria.p_Gemmatimonadetes.c_Gemmatimonadetes.o_Gemmatimonadales	5.22185			-
k_Bacteria.p_Patescibacteria.c_Saccharimonadia.o_Saccharimonadales.f_Saccharimonadales_fa	0			-
k_Bacteria.p_Chloroflexi.c_Anaerolineae.o_Anaerolineales.f_Anaerolineaceae	4.74473			-
k_Bacteria.p_Planctomycetes.c_Planctomycetacia.o_Gemmatales.f_Gemmataceae.g_Gemmataceae_uncultured	0			-
k_Bacteria.p_Chloroflexi.c_P2_11E.o_P2_11E_or	0			-
k_Bacteria.p_Proteobacteria.c_Alphaproteobacteria.o_Caulobacterales.f_Hyphomonadaceae.g_Oceanicaulis	5.08715			-
k_Bacteria.p_Actinobacteria.c_Actinobacteria.o_Micromonosporales.f_Micromonosporaceae	0			-
k_Bacteria.p_Firmicutes.c_Bacilli.o_Bacillales	0			-
k_Bacteria.p_Actinobacteria.c_Actinobacteria.o_Frankiales.f_Frankiales_unclassified.g_Frankiales_unclassified	0			-
k_Bacteria.p_Actinobacteria.c_Actinobacteria.o_Streptomycetales	0			-
k_Bacteria.p_Proteobacteria.c_Gammaproteobacteria.o_Enterobacteriales.f_Enterobacteriaceae.g_Providencia	0			-
k_Bacteria.p_Acidobacteria.c_Blastocatellia__Subgroup_4_.o_Pyrinomonadales.f_Pyrinomonadaceae.g_RB41	5.11711			-
k_Bacteria.p_Bacteroidetes.c_Bacteroidia.o_Chitinophagales	0			-
k_Bacteria.p_Acidobacteria.c_Subgroup_21.o_Subgroup_21_or.f_Subgroup_21_fa	0			-
k_Bacteria.p_Cyanobacteria.c_Oxyphotobacteria	0			-
k_Bacteria.p_Proteobacteria.c_Alphaproteobacteria.o_Rhizobiales.f_Xanthobacteraceae.g_Xanthobacteraceae_unclassified	4.67778			-
k_Bacteria.p_Chloroflexi.c_Anaerolineae.o_Anaerolineales.f_Anaerolineaceae.g_UTCFX1	4.74473			-
k_Bacteria.p_Actinobacteria.c_Actinobacteria.o_Streptosporangiales.f_Thermomonosporaceae	0			-
k_Bacteria.p_Gemmatimonadetes.c_Gemmatimonadetes.o_Gemmatimonadales.f_Gemmatimonadaceae.g_Gemmatimonadaceae_uncultured	0			-
k_Bacteria.p_Bacteroidetes.c_Bacteroidia.o_Chitinophagales.f_Chitinophagaceae	0			-
k_Bacteria.p_Actinobacteria.c_Acidimicrobiia.o_Microtrichales.f_Microtrichales_uncultured	0			-
k_Bacteria.p_Proteobacteria.c_Gammaproteobacteria.o_Oceanospirillales.f_Halomonadaceae	0			-
k_Bacteria.p_Cyanobacteria.c_Oxyphotobacteria.o_Oxyphotobacteria_unclassified.f_Oxyphotobacteria_unclassified.g_Oxyphotobacteria_unclassified	0			-
k_Bacteria.p_Actinobacteria.c_Acidimicrobiia	5.24988			-
k_Bacteria.p_Proteobacteria.c_Alphaproteobacteria.o_Alphaproteobacteria_unclassified.f_Alphaproteobacteria_unclassified.g_Alphaproteobacteria_unclassified	5.23004	R_SL	4.98939	0.013249
k_Bacteria.p_Patescibacteria.c_Saccharimonadia.o_Saccharimonadales.f_Saccharimonadales_fa.g_Saccharimonadales_ge	0			-
k_Bacteria.p_Proteobacteria.c_Alphaproteobacteria.o_Rhizobiales.f_Xanthobacteraceae	4.67778			-
k_Bacteria.p_Proteobacteria.c_Gammaproteobacteria.o_Oceanospirillales.f_Halomonadaceae.g_Halomonadaceae_unclassified	0			-
k_Bacteria.p_Proteobacteria.c_Alphaproteobacteria.o_Sphingomonadales.f_Sphingomonadaceae	5.11711			-
k_Bacteria.p_Firmicutes	0			-
k_Bacteria.p_Proteobacteria.c_Gammaproteobacteria.o_Gammaproteobacteria_unclassified.f_Gammaproteobacteria_unclassified.g_Gammaproteobacteria_unclassified	0			-
k_Bacteria.p_Chloroflexi.c_Anaerolineae.o_SBR1031.f_SBR1031_fa	0			-
k_Bacteria.p_Gemmatimonadetes.c_AKAU4049	4.82391			-
k_Bacteria.p_Actinobacteria.c_Actinobacteria.o_Streptomycetales.f_Streptomycetaceae	0			-
k_Bacteria.p_Proteobacteria.c_Gammaproteobacteria.o_Gammaproteobacteria_Incertae_Sedis.f_Unknown_Family	0			-
k_Bacteria.p_Proteobacteria.c_Gammaproteobacteria.o_Gammaproteobacteria_Incertae_Sedis.f_Unknown_Family.g_Acidibacter	0			-
k_Bacteria.p_Acidobacteria.c_Subgroup_21.o_Subgroup_21_or	0			-
k_Bacteria.p_Acidobacteria.c_Subgroup_6.o_Subgroup_6_or	5.24988			-
k_Bacteria.p_Proteobacteria.c_Alphaproteobacteria.o_Rhizobiales	4.67778			-
k_Bacteria.p_Chloroflexi.c_KD4_96.o_KD4_96_or	0			-
k_Bacteria.p_Proteobacteria.c_Alphaproteobacteria.o_Rhizobiales.f_Devosiaceae	0			-
k_Bacteria.p_Gemmatimonadetes.c_Gemmatimonadetes.o_Gemmatimonadales.f_Gemmatimonadaceae.g_Gemmatimonadaceae_unclassified	5.22185			-
k_Bacteria.p_Actinobacteria.c_Actinobacteria.o_Corynebacteriales.f_Mycobacteriaceae	0			-
k_Bacteria.p_Gemmatimonadetes.c_Longimicrobia.o_Longimicrobiales.f_Longimicrobiaceae.g_Longimicrobiaceae_ge	4.74473			-
k_Bacteria.p_Chloroflexi.c_KD4_96.o_KD4_96_or.f_KD4_96_fa.g_KD4_96_ge	0			-
k_Bacteria.p_Acidobacteria.c_Subgroup_21	0			-
k_Bacteria.p_Actinobacteria.c_Actinobacteria.o_Propionibacteriales.f_Nocardioidaceae	0			-
k_Bacteria.p_Patescibacteria.c_Saccharimonadia.o_Saccharimonadales	0			-
k_Bacteria.p_Actinobacteria.c_Actinobacteria	0			-
k_Bacteria.p_Actinobacteria	5.24988			-
k_Bacteria.p_Proteobacteria.c_Alphaproteobacteria.o_Caulobacterales.f_Hyphomonadaceae.g_SWB02	0			-
k_Bacteria.p_Actinobacteria.c_Acidimicrobiia.o_Microtrichales.f_Microtrichales_uncultured.g_Microtrichales_uncultured_ge	0			-
k_Bacteria.p_Actinobacteria.c_Actinobacteria.o_Propionibacteriales.f_Nocardioidaceae.g_Nocardioides	0			-
k_Bacteria	6			-
